# Supplementary figures and images for: ACE2 is the critical in vivo receptor for SARS-CoV-2 in a novel COVID-19 mouse model with TNF- and IFNγ-driven immunopathology
Source: eLife journal article supplement (doi:10.7554/elife.74623), 2022-01-06

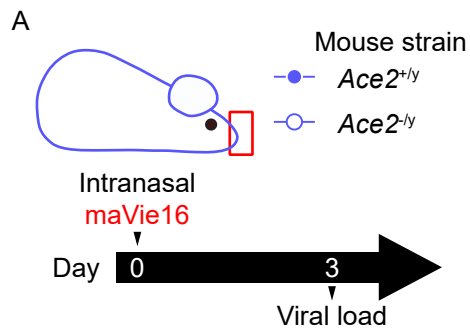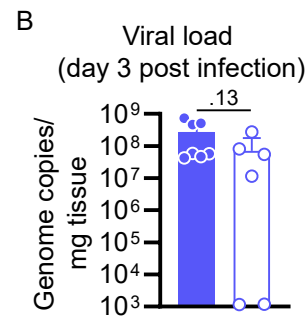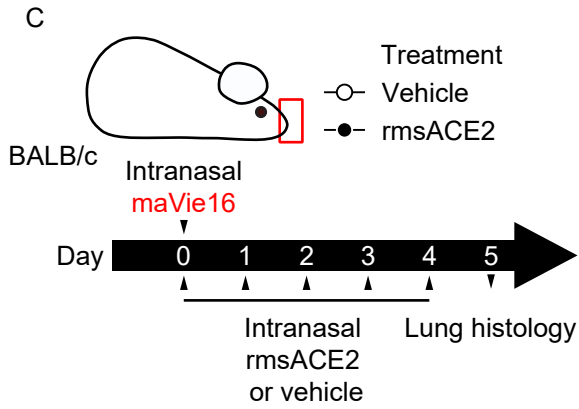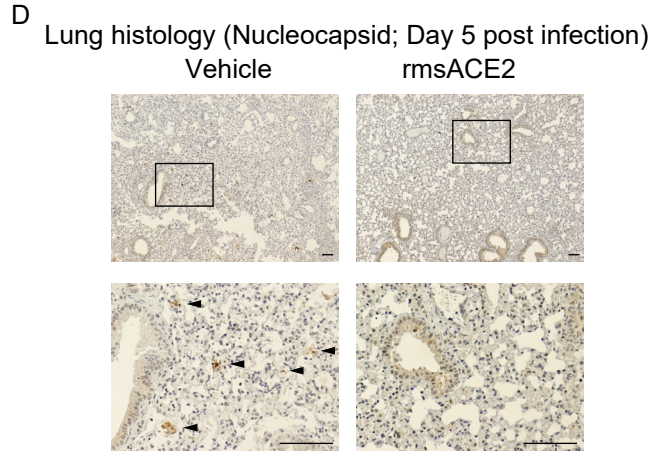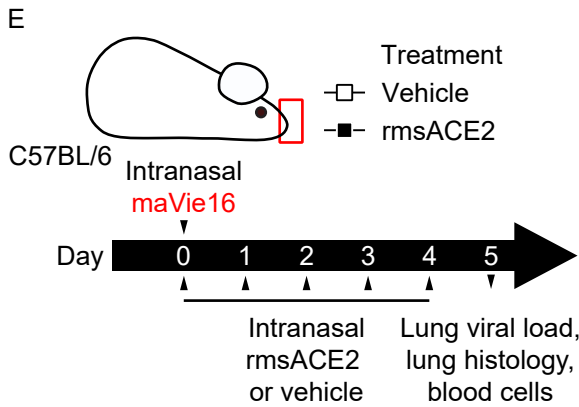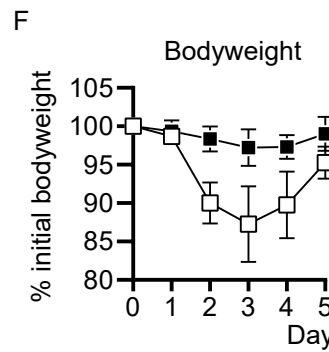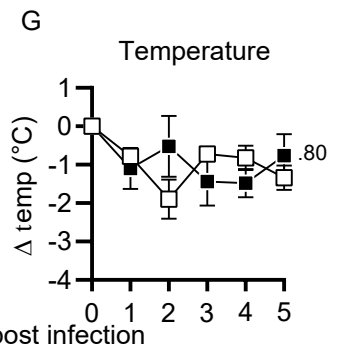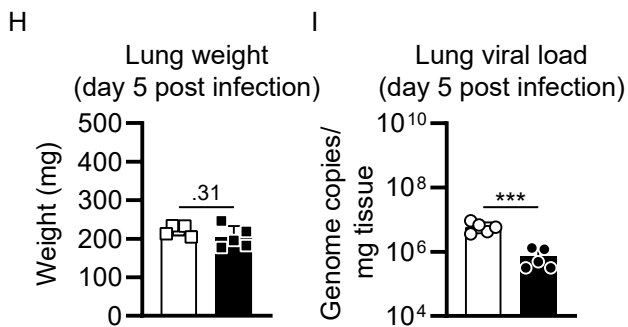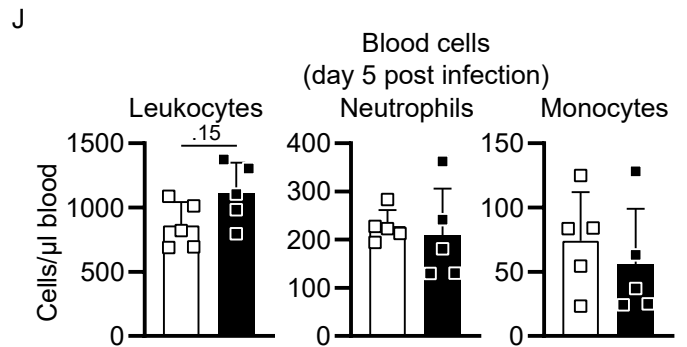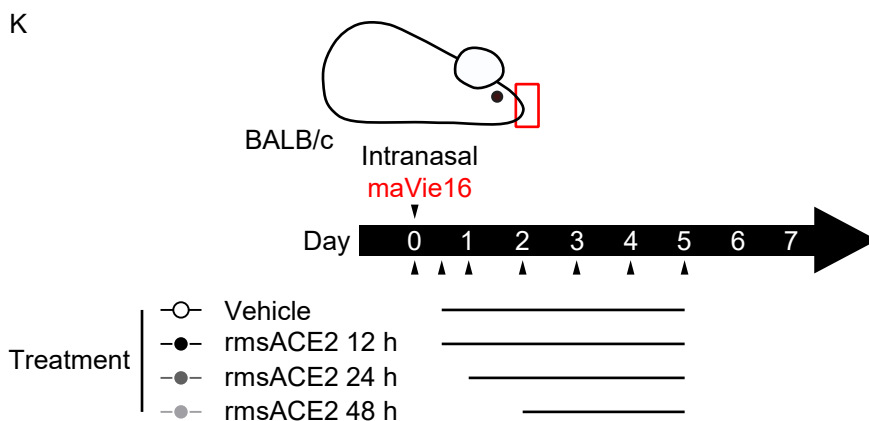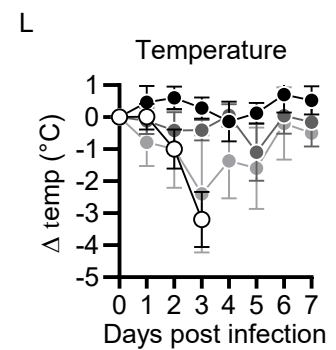

Supplement: supp [file elife-74623-supp-v1.zip]

A

## Flow cytometry gating strategy (lung)

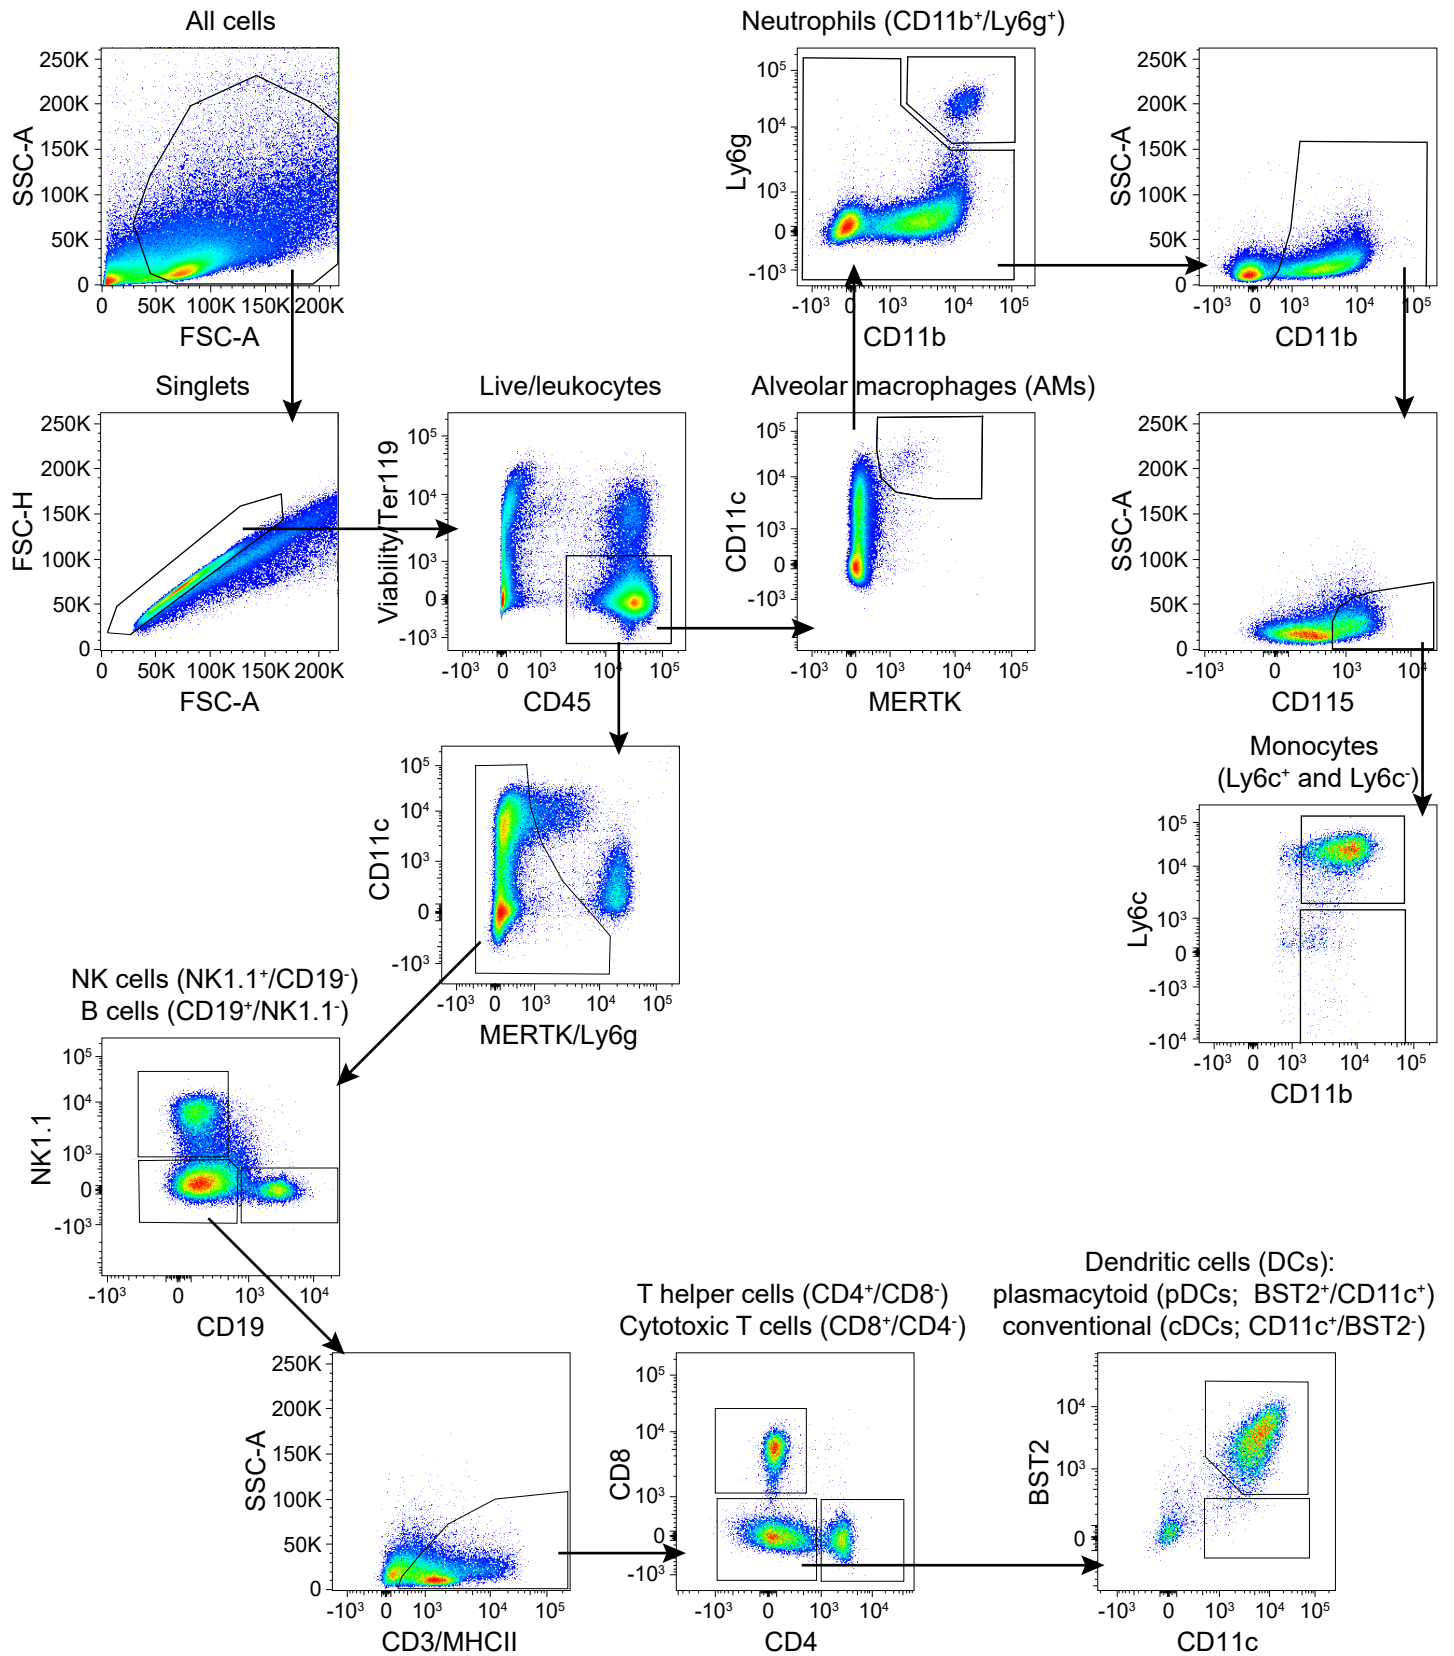

Supplement: supp [file elife-74623-supp-v1.zip]

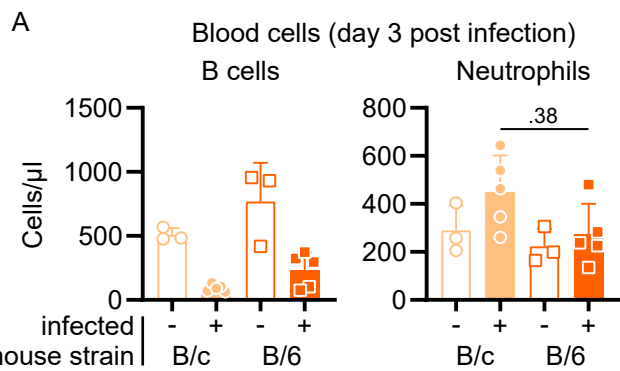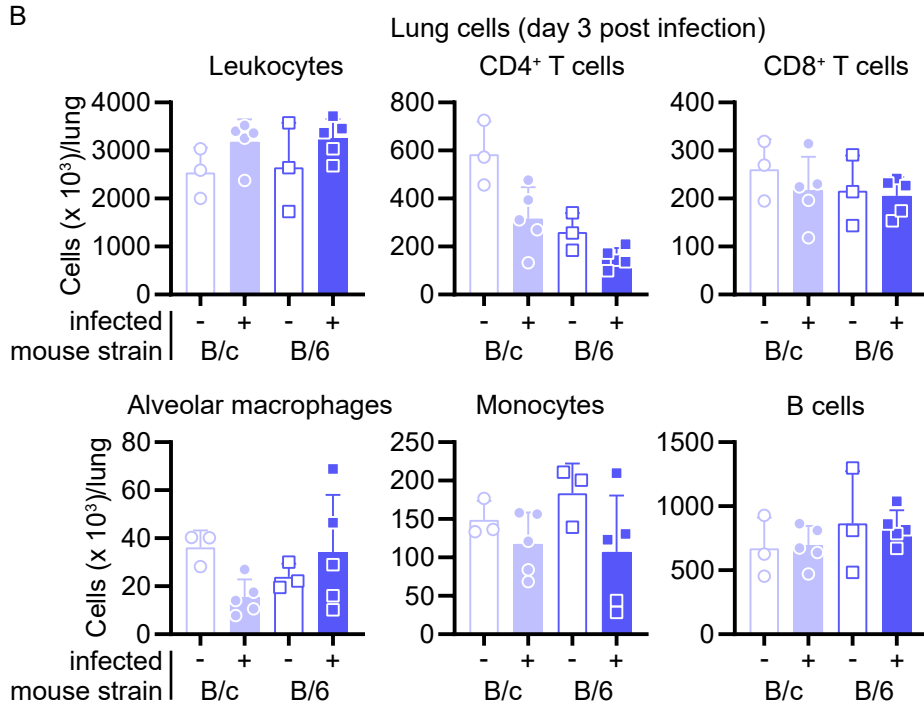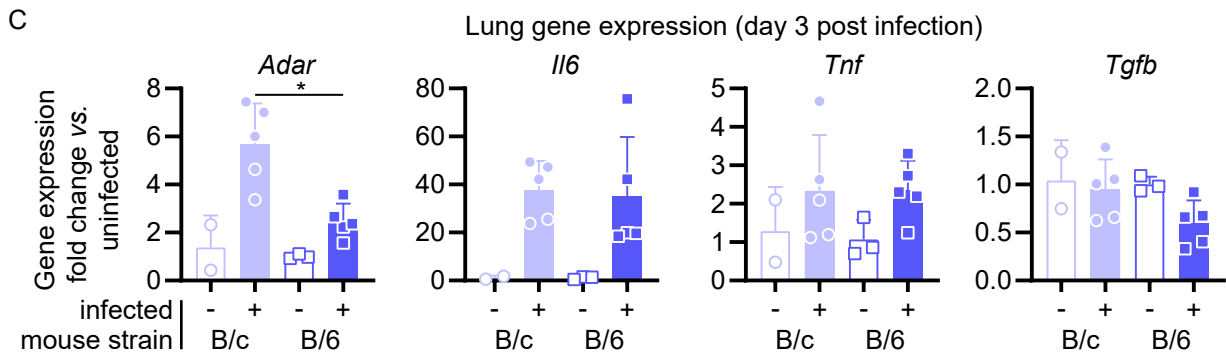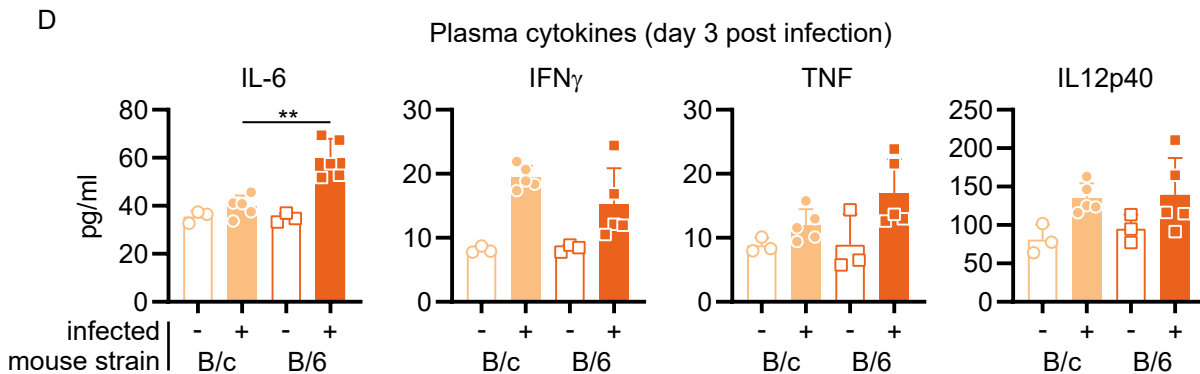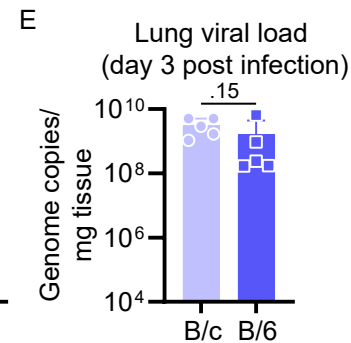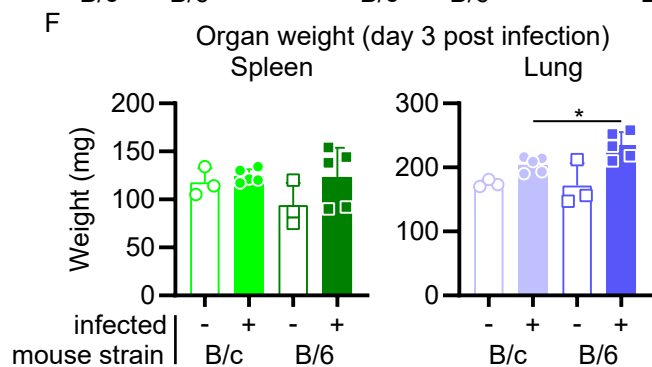

Supplement: supp [file elife-74623-supp-v1.zip]

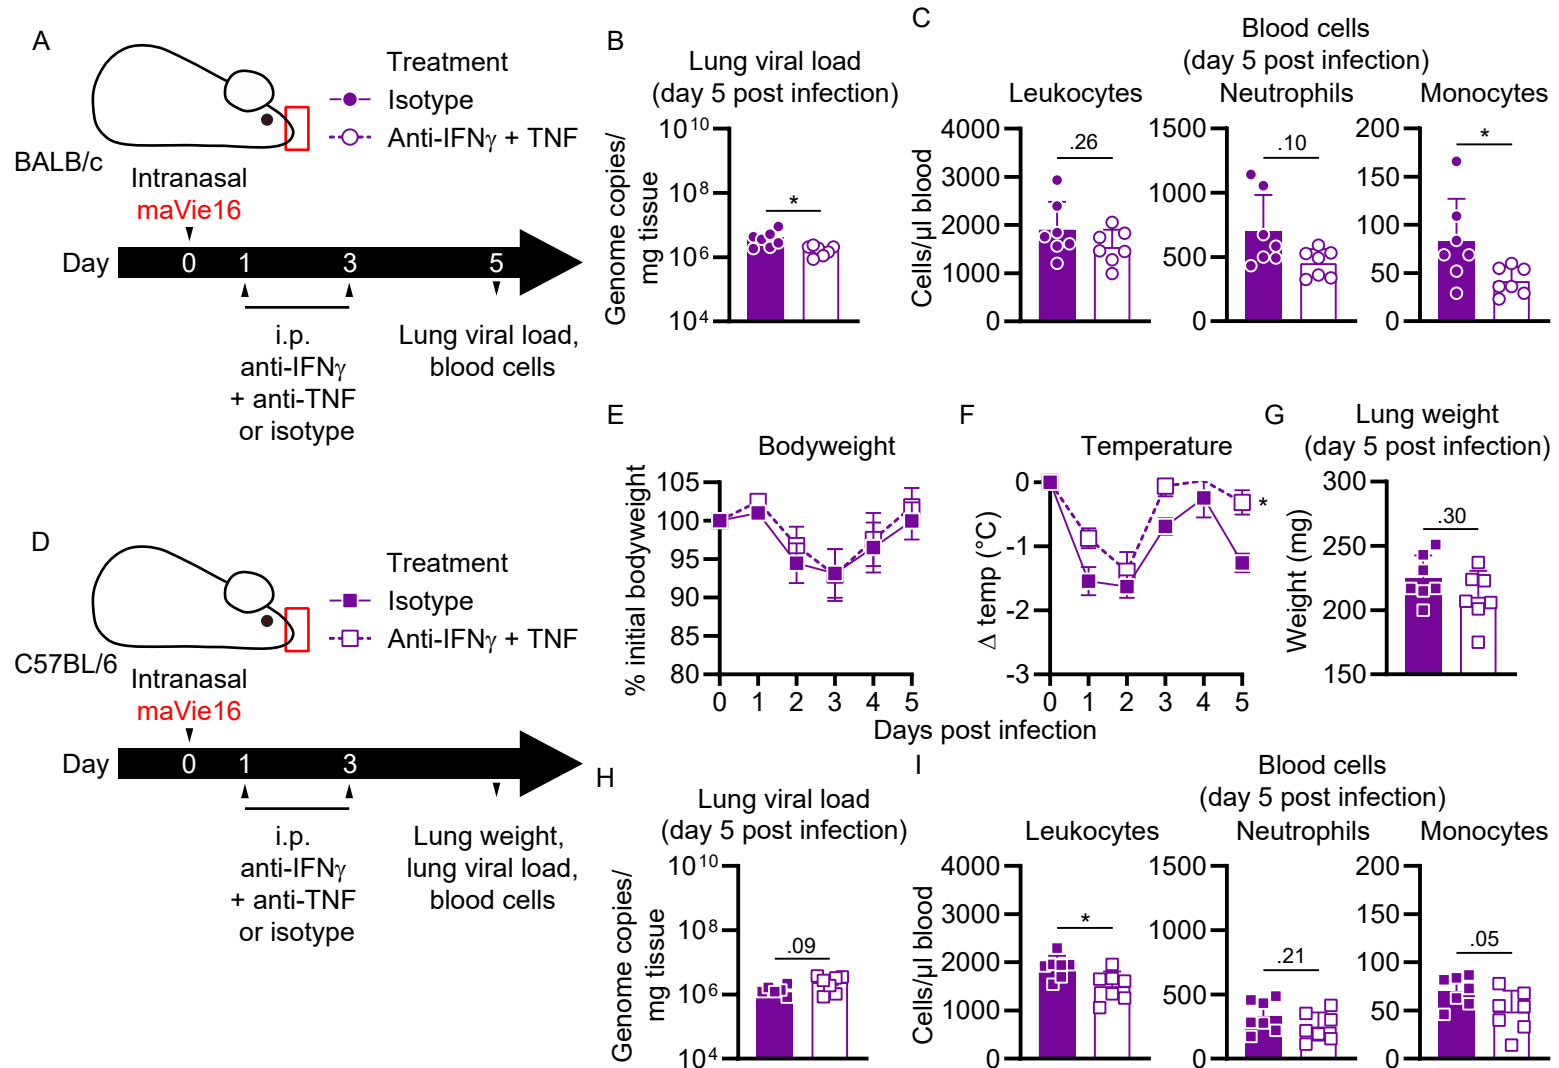

Supplement: supp [file elife-74623-supp-v1.zip]

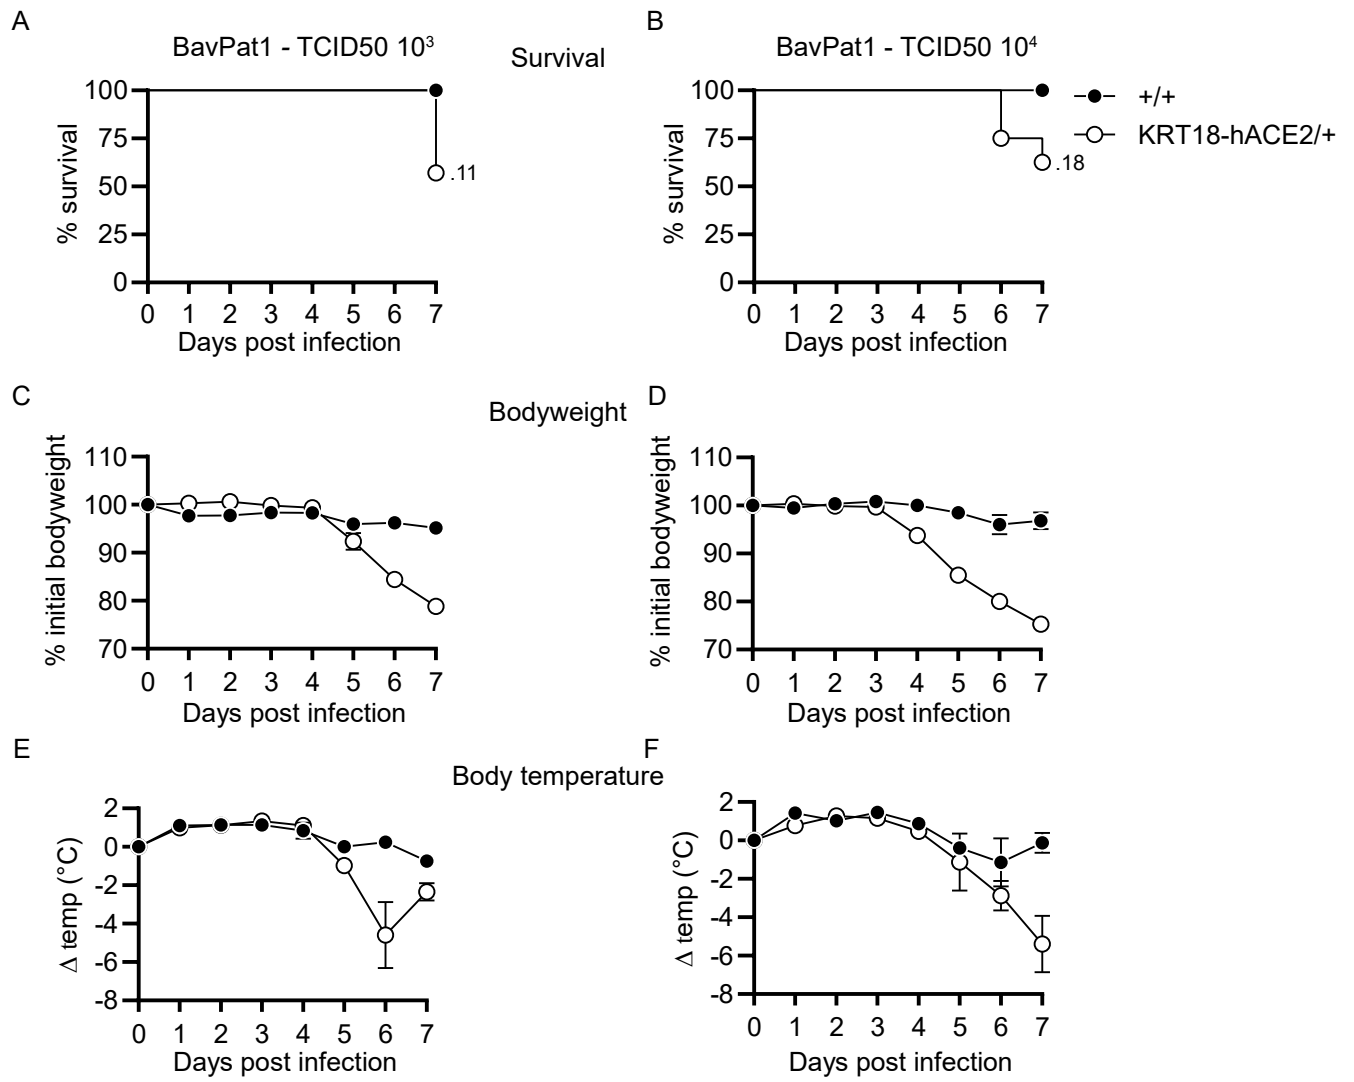

Supplement: supp [file elife-74623-supp-v1.zip]

A

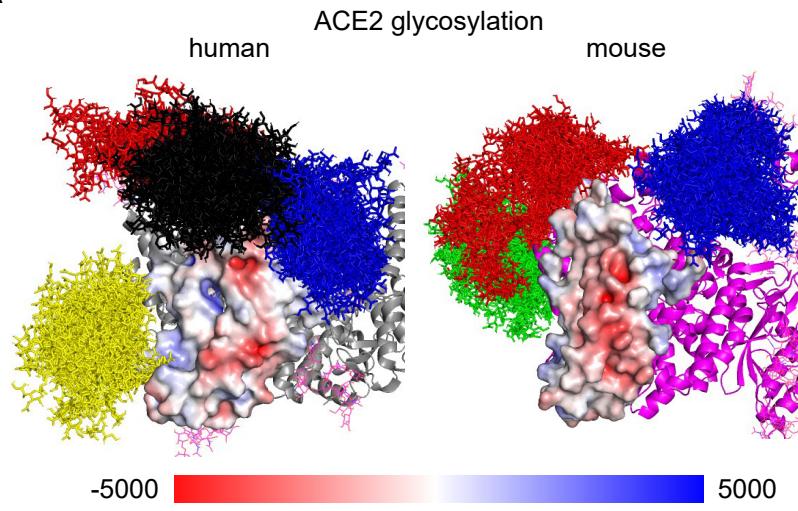

B

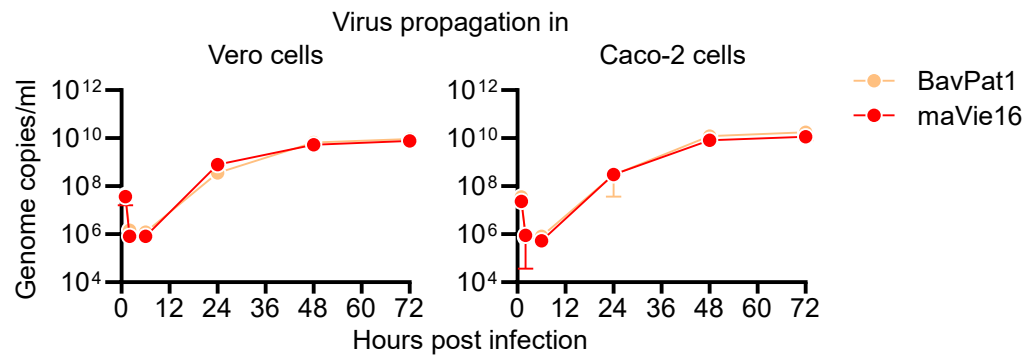

Supplement: supp [file elife-74623-supp-v1.zip]

A

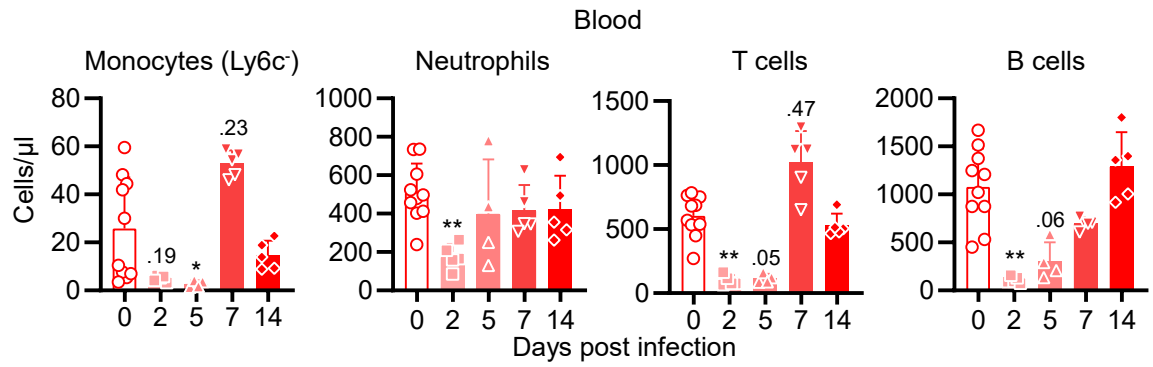

B

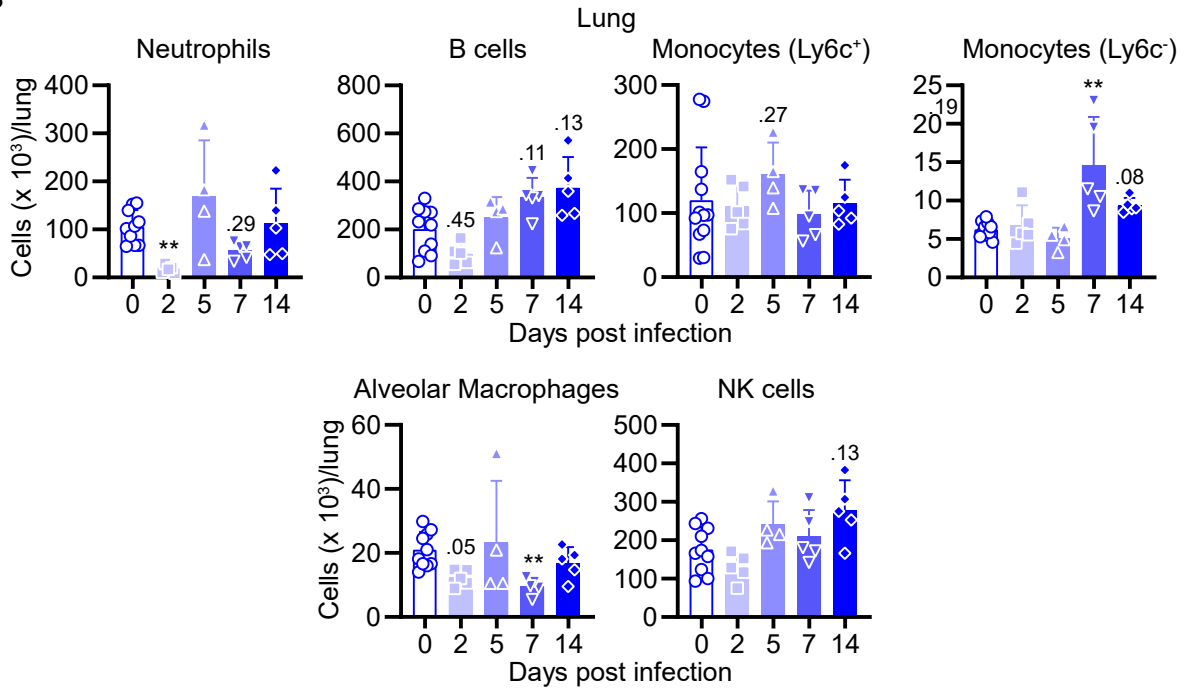

C

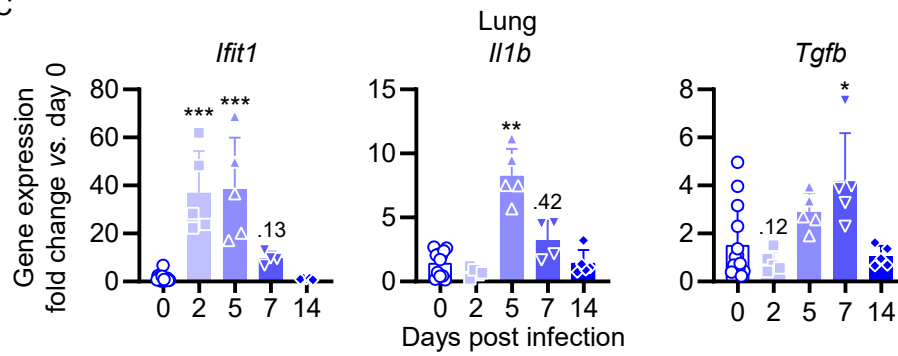

D

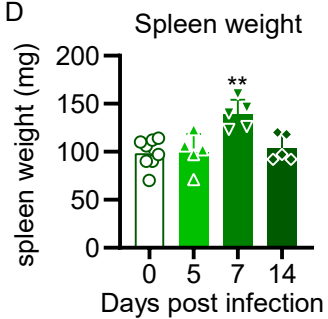

Supplement: supp [file elife-74623-supp-v1.zip]
